# Supplementary material for: Lipidomic analysis of human plasma reveals ether-linked lipids that are elevated in morbidly obese humans compared to lean
Source: PubMed Central journal article supplement (PMC3663699; doi:10.1186/1758-5996-5-24), 2013-05-14
Supplement: 1758-5996-5-24-S1.pdf [file 1758-5996-5-24-S1.pdf]

Supplementary Table 1. Ions of interest identified in LC/MS analysis that were selected for MS/MS. p-value was calculated using an unpaired t-test comparison of group means for each ion. Ave [c] (control) and [pre] (obese pre-surgical) values are average relative abundance of each ion for each group expressed in arbitrary units. C= control, O= obese pre-surgical

| Positive Mode     |         |         |           |           | Negative Mode     |         |          |           |           |
|-------------------|---------|---------|-----------|-----------|-------------------|---------|----------|-----------|-----------|
| Ret. Time and Ion | P-value | Ave [c] | Ave [pre] | Higher in | Ret. Time and Ion | P-value | Ave [c]  | Ave [pre] | Higher in |
| 7.99_612.1680     | 0.046   | 0.004   | 0.054     | O         | 9.26_829.5643     | 0.022   | 0.0139   | 0.1783    | O         |
| 9.52_237.0804     | 0.033   | 0.032   | 0.849     | O         | 9.99_666.6038     | 0.000   | 6.9303   | 11.9490   | O         |
| 11.51_864.8034    | 0.012   | 7.398   | 11.860    | O         | 9.21_750.5424     | 0.016   | 8.2493   | 13.7307   | O         |
| 3.35_205.0854     | 0.025   | 15.968  | 12.118    | C         | 11.44_917.7758    | 0.042   | 7.4802   | 13.9198   | O         |
| 7.19_366.3747     | 0.018   | 19.978  | 12.180    | C         | 9.22_832.6023     | 0.005   | 8.8548   | 14.4645   | O         |
| 4.52_522.3565     | 0.041   | 17.113  | 12.594    | C         | 9.27_817.6412     | 0.013   | 9.6848   | 15.3987   | O         |
| 5.20_304.2618     | 0.044   | 15.000  | 12.668    | C         | 9.03_856.6022     | 0.009   | 10.4531  | 16.2154   | O         |
| 3.35_301.1414     | 0.044   | 16.211  | 13.217    | C         | 11.44_903.7659    | 0.026   | 9.9010   | 16.7782   | O         |
| 10.09_719.5164    | 0.013   | 18.992  | 13.423    | C         | 7.78_733.5486     | 0.004   | 11.9465  | 17.6002   | O         |
| 12.12_1128.3085   | 0.039   | 6.868   | 13.549    | O         | 10.31_711.6237    | 0.030   | 12.3959  | 18.1693   | O         |
| 4.60_930.5785     | 0.027   | 21.794  | 15.768    | C         | 11.25_901.7457    | 0.038   | 12.6943  | 20.4485   | O         |
| 6.42_338.3426     | 0.026   | 25.424  | 17.522    | C         | 9.34_527.4475     | 0.036   | 15.3125  | 22.4955   | O         |
| 3.35_149.0242     | 0.023   | 25.520  | 19.548    | C         | 10.30_708.6421    | 0.021   | 17.4746  | 26.3310   | O         |
| 7.23_344.2969     | 0.041   | 28.497  | 21.618    | C         | 8.11_838.5567     | 0.039   | 17.6692  | 27.8192   | O         |
| 8.70_734.5697     | 0.015   | 27.614  | 23.764    | C         | 10.30_694.6343    | 0.013   | 24.1369  | 36.2948   | O         |
| 9.30_811.6669     | 0.016   | 43.954  | 33.723    | C         | 9.02_870.6202     | 0.028   | 30.8649  | 44.7140   | O         |
| 3.80_702.4395     | 0.026   | 63.843  | 47.216    | C         | 8.91_830.5908     | 0.003   | 32.4771  | 45.3975   | O         |
| 9.94_705.4997     | 0.028   | 65.940  | 47.692    | C         | 8.01_885.5468     | 0.011   | 45.6587  | 62.1103   | O         |
| 9.60_813.6826     | 0.012   | 81.572  | 63.719    | C         | 8.89_868.6058     | 0.010   | 41.5375  | 63.8662   | O         |
|                   |         |         |           |           | 8.47_802.5587     | 0.019   | 49.2173  | 64.2907   | O         |
|                   |         |         |           |           | 6.90_493.3676     | 0.036   | 121.6714 | 97.4658   | C         |
|                   |         |         |           |           | 8.91_844.6054     | 0.005   | 94.6827  | 130.2282  | O         |
|                   |         |         |           |           | 8.46_816.5744     | 0.031   | 161.8050 | 208.0984  | O         |
|                   |         |         |           |           | 8.70_599.4461     | 0.029   | 729.2035 | 615.2231  | C         |
